# Supplementary material for: Plasma Leptin Is Elevated in Acute Exacerbation of Idiopathic Pulmonary Fibrosis
Source: Hindawi journal article supplement (doi:10.1155/2016/6940480), 2016-01-01
Supplement: f1 [file 6940480.f1.pdf]

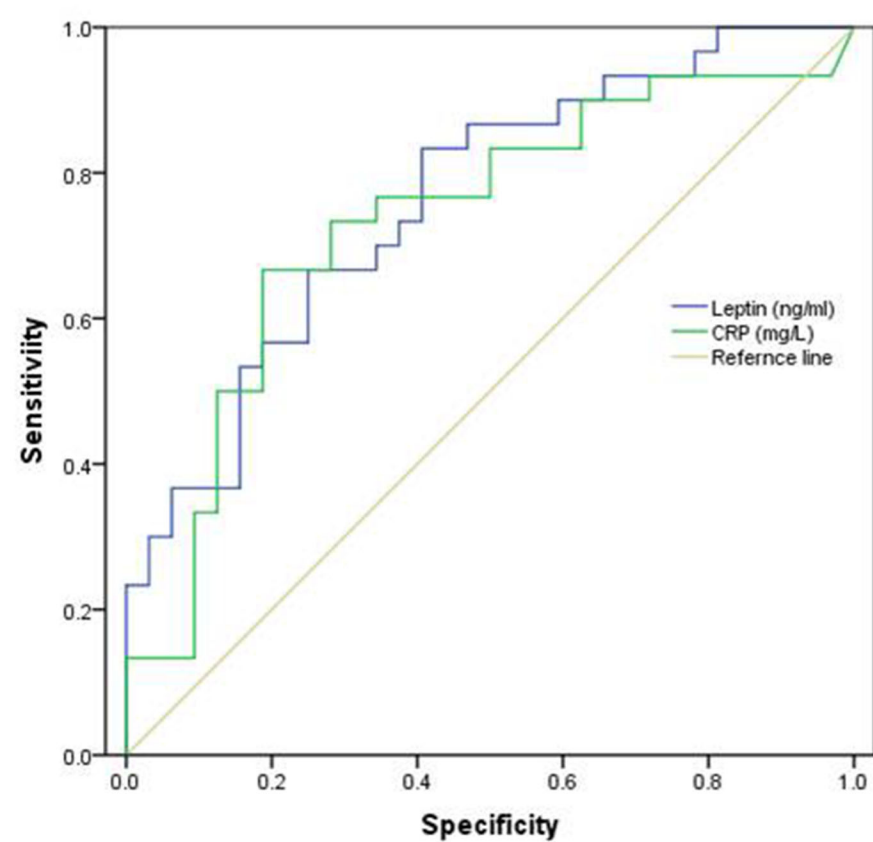

A

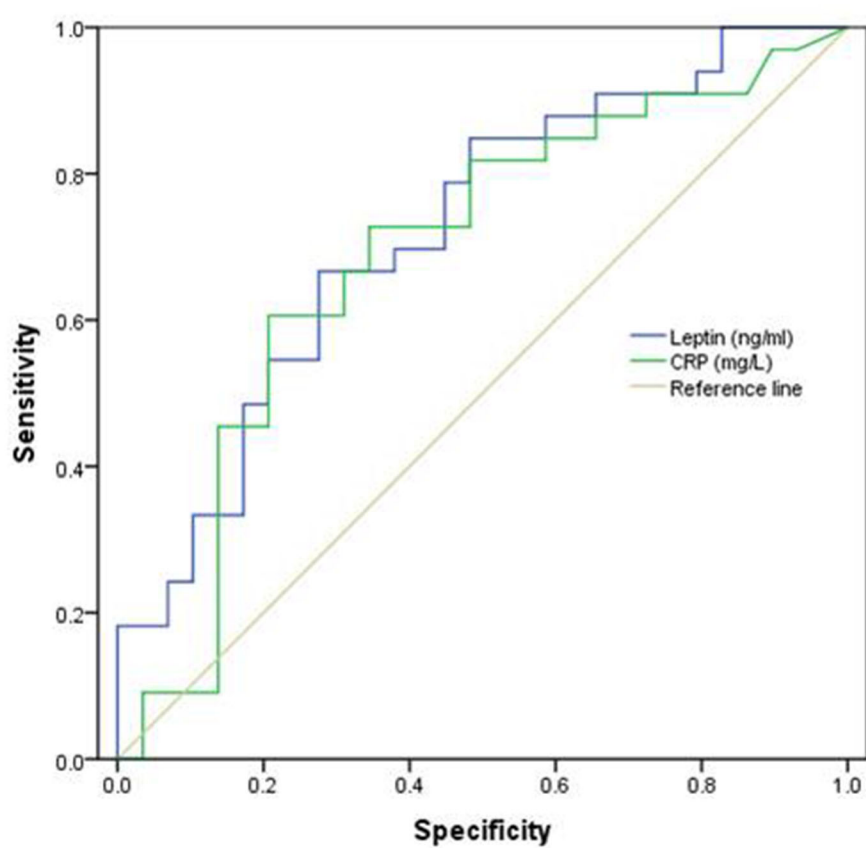

B
